# Supplementary material for: Oxidative Stress in Intervertebral Disc Degeneration: New Insights from Bioinformatic Strategies
Source: Hindawi journal article supplement (doi:10.1155/2022/2239770), 2022-01-01
Supplement: f1 [file 2239770.f1.pdf]

**Supplementary Table 1. Detailed information of ten sample tissues.**

| <b>Sample number</b> | <b>Disc level</b> | <b>Pfirschmann Grade</b> | <b>Gender</b> | <b>Age, year</b> |
|----------------------|-------------------|--------------------------|---------------|------------------|
| IDD1                 | L4/L5             | 5                        | Female        | 32               |
| IDD2                 | L3/L4             | 5                        | Male          | 38               |
| IDD3                 | L3/L4             | 4                        | Male          | 42               |
| IDD4                 | L5/S1             | 5                        | Male          | 45               |
| IDD5                 | L4/L5             | 4                        | Female        | 27               |
| Normal1              | L3/L4             | 1                        | Male          | 33               |
| Normal2              | L3/L4             | 1                        | Male          | 35               |
| Normal3              | L4/L5             | 1                        | Male          | 41               |
| Normal4              | L5/S1             | 1                        | Female        | 43               |
| Normal5              | L4/L5             | 1                        | Male          | 52               |

IDD, intervertebral disc degeneration; L, lumbar vertebra; S, sacral vertebra.

**Supplementary Table 2 The list of oxidative stress-related genes**

ABCC2  
ABCD1  
ABL1  
ACOX2  
ADA  
ADAM9  
ADIPOQ  
ADNP2  
ADPRS  
AGAP3  
AIF1  
AIFM2  
AKR1C3  
AKT1  
ALAD  
ALDH3B1  
ALOX5  
ANGPTL7  
ANKRD2  
ANKZF1  
ANXA1  
APEX1  
APOA4  
APOD  
APOE  
APP  
APTX  
AQP1  
ARG1  
ARL6IP5  
ARNT  
ARNTL  
ATF4  
ATG7  
ATOX1  
ATP13A2  
ATP2A2  
ATP7A  
ATRNL  
AXL  
BAD  
BAG5  
BAK1  
BCL2  
BECN1  
BMP7  
BNIP3  
BRF2  
BTK  
C19orf12  
CA3  
CAMKK2

CAPN2  
CASP3  
CAT  
CBX8  
CCL19  
CCNA2  
CCR7  
CCS  
CD36  
CD38  
CDK2  
CFLAR  
CHCHD2  
CHD6  
CHRNA4  
CHUK  
CLN8  
COA8  
COL1A1  
CPEB2  
CRK  
CRYAB  
CRYGD  
CYBA  
CYBB  
CYCS  
CYGB  
CYP1B1  
CYP2E1  
DAPK1  
DGKK  
DHCR24  
DHFR  
DHFRP1  
DHRS2  
DIABLO  
DNM2  
DPEP1  
DUOX1  
DUOX2  
DUSP1  
ECT2  
EDN1  
EEF2  
EGFR  
EGLN1  
EIF2S1  
ENDOG  
EPAS1  
EPX  
ERCC1  
ERCC2  
ERCC3

ERCC6  
ERCC6L2  
ERCC8  
ERMP1  
ERN1  
ERO1A  
ETFDH  
ETS1  
ETV5  
EZH2  
FABP1  
FANCC  
FANCD2  
FBLN5  
FBXO7  
FBXW7  
FER  
FGF8  
FKBP1B  
FOS  
FOSL1  
FOXO1  
FOXO3  
FUT8  
FXN  
FYN  
G6PD  
GATA4  
GCH1  
GCLC  
GCLM  
GGT7  
GJB2  
GLRX2  
GNAO1  
GPR37  
GPR37L1  
GPX1  
GPX2  
GPX3  
GPX4  
GPX5  
GPX6  
GPX7  
GPX8  
GSKIP  
GSR  
GSS  
GSTP1  
GUCY1B1  
H19  
HAO1  
HBA1

HBA2  
HBB  
HDAC2  
HDAC6  
HGF  
HIF1A  
HMOX1  
HMOX2  
HNRNPD  
HNRNPM  
HP  
HSF1  
HSPA1A  
HSPA1B  
HSPB1  
HTRA2  
HYAL1  
HYAL2  
IDH1  
IL10  
IL18RAP  
IL6  
IMPACT  
INS  
IPCEF1  
JAK2  
JUN  
KCNA5  
KCNC2  
KDM6B  
KEAP1  
KLF2  
KLF4  
KRT1  
LANCL1  
LDHA  
LIAS  
LONP1  
LPO  
LRRK2  
MACROH2A1  
MAP1LC3A  
MAP3K5  
MAPK1  
MAPK13  
MAPK3  
MAPK7  
MAPK8  
MAPK9  
MAPKAP1  
MAPT  
MB  
MBL2

MCL1  
MCTP1  
MEAK7  
MELK  
MET  
MGAT3  
MGST1  
MICB  
MIR103A1  
MIR107  
MIR132  
MIR133A1  
MIR17  
MIR195  
MIR19A  
MIR21  
MIR29B1  
MIR34A  
MIR675  
MIR92A1  
MIRLET7B  
MMP14  
MMP2  
MMP3  
MMP9  
MPO  
MPV17  
MSRA  
MSRB2  
MSRB3  
MT-CO1  
MT-ND1  
MT-ND3  
MT-ND5  
MT-ND6  
MT3  
MTF1  
MTR  
MYB  
MYEF2  
NAPRT  
NCF1  
NCF2  
NCF4  
NCOA7  
NDUFA12  
NDUFA6  
NDUFB4  
NDUFS2  
NDUFS8  
NEIL1  
NET1  
NFE2L1

NFE2L2  
NME2  
NME5  
NME8  
NOL3  
NONO  
NOS3  
NOX1  
NOX4  
NOX5  
NQO1  
NR4A2  
NR4A3  
NUDT1  
NUDT15  
NUDT2  
OGG1  
OSER1  
OXR1  
OXSR1  
P4HB  
PAGE4  
PARK7  
PARP1  
PAWR  
PAX2  
PCGF2  
PCNA  
PDCD10  
PDE8A  
PDGFD  
PDGFRA  
PDGFRB  
PDK1  
PDK2  
PDLIM1  
PENK  
PINK1  
PJVK  
PKD2  
PLA2R1  
PLEKHA1  
PLK3  
PML  
PNKP  
PNPT1  
PPARGC1A  
PPARGC1B  
PPIA  
PIIF  
PPP1R15B  
PPP2CB  
PPP5C

PRDX1  
PRDX2  
PRDX3  
PRDX4  
PRDX5  
PRDX6  
PRKAA1  
PRKAA2  
PRKCD  
PRKD1  
PRKN  
PRKRA  
PRNP  
PRODH  
PRR5L  
PSEN1  
PSIP1  
PSMB5  
PTGS1  
PTGS2  
PTK2B  
PTPRK  
PTPRN  
PXDN  
PXDNL  
PXN  
PYCR1  
PYCR2  
PYROXD1  
RACK1  
RAD52  
RBM11  
RBPMS  
RELA  
REST  
RGS14  
RHOB  
RIPK1  
RIPK3  
RNF112  
ROMO1  
RPS3  
S100A7  
SCARA3  
SCGB1A1  
SDC1  
SELENOK  
SELENON  
SELENOP  
SELENOS  
SESN1  
SESN2  
SESN3



SETX  
SFPQ  
SGK2  
SIGMAR1  
SIN3A  
SIRPA  
SIRT1  
SIRT2  
SLC1A1  
SLC23A2  
SLC25A24  
SLC7A11  
SLC8A1  
SMPD3  
SNCA  
SOD1  
SOD2  
SOD3  
SP1  
SPHK1  
SRC  
SRXN1  
STAR  
STAU1  
STK24  
STK25  
STK26  
STOX1  
STX2  
STX4  
SUMO4  
TAT  
TBC1D24  
THG1L  
TLDC2  
TLR4  
TLR6  
TMEM161A  
TNFAIP3  
TOR1A  
TP53  
TP53INP1  
TPM1  
TPO  
TRA2B  
TRAF2  
TRAP1  
TRESX1  
TRPA1  
TRPC6  
TRPM2  
TSC1  
TXN

TXN2  
TXNIP  
TXNRD1  
TXNRD2  
UBE3A  
UBQLN1  
UCN  
UCP1  
UCP2  
UCP3  
VKORC1L1  
VNN1  
VRK2  
WNT1  
WNT16  
WRN  
XRCC1  
ZC3H12A  
ZNF277  
ZNF580  
ZNF622

**Supplementary Table 3 The list of immunity-related genes IL32**

ST3GAL6

KRT1

PTPRB

KCNE4

FCGR2B

XCL1

NTM

IFNA1

IL12A

VNN2

RCN3

BTLA

DOCK10

CRYBB1

SLC18A2

CXCR1

GPR35

S100A12

LYZ

WAS

FBXO6

CDH6

SPI1

PDIA3

FCGRT

CEACAM19

SLA

ANTXR2

EOMES

FCRL1

GBP5

NCF1B

LSAMP

GPR171

LIMD2

LRRC32

EIF2AK2

ZDHHC20

STAT1

IL18BP

HSPA1L

TREML1

PLEKHM3

DACT1

CD96

HLA-DRB6

FUT7

ACAP1

PGLYRP4

IL9

MEF2B

FPR3  
LRP1  
ADAM8  
GLT8D2  
IL20  
GALM  
ATP10A  
PTPRM  
RDH12  
PSTPIP1  
PLEKHO2  
TFEC  
VCAM1  
CASS4  
RELB  
COTL1  
LRCH2  
ZKSCAN8  
ACVR2B  
TRABD2A  
CD200  
CISH  
TNFSF12-TNFSF13  
USHBP1  
TNFSF12  
SP110  
PCOLCE  
THPO  
ABCD2  
TYMP  
MMRN2  
PML  
CD248  
FIBIN  
FBP1  
TNFRSF14  
CD1A  
NRROS  
ADAT1  
TSPAN32  
TTC37  
N4BP2L1  
LAMP5  
AMIGO3  
IFIT5  
FAM92B  
HSPA5  
MLPH  
HLA-F  
NFKBIE  
ADAP2  
ARHGAP31  
FCRL2

USP12  
PCDH12  
IRF8  
TGM1  
SUSD3  
IL9R  
SERPINF1  
HS3ST2  
FLT3LG  
MPL  
ZAP70  
ENO3  
LAMTOR2  
FYN  
BIRC6  
HLA-DPB2  
GBP2  
ANXA1  
SSTR3  
IL11RA  
DSP  
SPRR2E  
ARHGAP22  
BCL6B  
PCYOX1L  
RBM38  
LILRA5  
LYPD5  
PILRA  
IL12RB2  
NAPSB  
SMAP2  
LTB  
FAM83A  
NRP1  
FLT3  
RAD54L2  
NLRC3  
FYB1  
DDX58  
ECSCR  
CCR9  
LAIR1  
COL6A2  
NFAM1  
ERAP2  
JAK2  
SIT1  
IFNG  
CD300E  
NHLRC2  
N4BP2  
BTN3A2

PTCRA  
DNAH8  
C3  
TRIM22  
TMEM26  
RHOH  
CDK15  
GGT5  
HEPH  
PLA1A  
CD33  
SCML4  
NOD2  
IFI44  
LOXL3  
IVL  
CLECL1  
PLXNC1  
TNFRSF10C  
TMEM170B  
LINC00426  
ADCY4  
NFYB  
CALHM6  
JUP  
PLXNA4  
CHST2  
EMILIN2  
FABP3  
LILRB1  
FGD2  
DOCK2  
SLC1A7  
HYDIN  
PSMD1  
PARP14  
LINC00654  
CSF3R  
WFDC12  
TNFSF13  
CD300LB  
IL24  
NTNG2  
NBEA  
DCSTAMP  
KIAA1755  
RASSF3  
TNFSF4  
ARHGAP6  
PSMC2  
CARD8  
HAMP  
LAT

BIN2  
CD69  
SLCO5A1  
GCSAML  
CD74  
PSMD3  
CD244  
FMOD  
SLC15A3  
STAC3  
PLPPR4  
DOCK8  
WDFY4  
RGS1  
SIGLEC11  
CD1B  
PDE4B  
PRLR  
ACSM5  
NOVA2  
IGLL1  
REST  
UTS2  
NECTIN3  
GNGT2  
LAG3  
FERMT3  
ASRGL1  
PSAP  
TMEM150B  
PREX1  
ICAM2  
TGFB1  
CLEC14A  
ADGRL4  
SIGLEC17P  
HTRA4  
CLOCK  
MMP2  
EP300  
SERPING1  
POU2F2  
SPATA13  
FBN1  
CCL7  
IL22RA2  
TNNT2  
ICOS  
HLA-B  
IFIH1  
GATM  
LAP3  
RASGRF2

GPR65  
RNASE2  
IFNK  
VMO1  
MINDY2  
IFNW1  
GZMH  
FCGR1B  
RGL4  
PLPP7  
CRYBG2  
HIST1H2AG  
LAMA4  
CD3D  
RFTN1  
CDH5  
CREBRF  
DCBLD1  
TIMP2  
FCGR3A  
IL17B  
HCP5  
TMEM229B  
HEPHL1  
PSMC3  
ITGAM  
PALM2-AKAP2  
NMI  
IGF1  
S100A7  
HCST  
LCP2  
LDLRAD4  
NBEAL1  
APOC1  
TM6SF1  
PRKCQ  
CYBA  
IL20RB  
HERPUD1  
TSHZ3  
HLA-DRB1  
FAM78A  
TPK1  
SYTL3  
KRT14  
ERAP1  
PLXND1  
ADAMTS9  
DCHS1  
IFNA2  
UBASH3A  
PRL



IL21R  
TRPC4AP  
IL4R  
HIST1H2AE  
COL18A1  
KCNAB2  
RAB20  
CX3CL1  
ITGAD  
TBXAS1  
SIGLEC7  
GAB3  
PCED1B-AS1  
LILRA6  
CD302  
KCNJ8  
HLA-DMA  
CLEC12A  
COL6A3  
CXorf21  
KLHDC10  
LRP6  
PTPN22  
ACVR1B  
IL4  
CXCR2  
DBH  
TRIM61  
CD40LG  
PLD4  
PATL2  
GGT1  
FCGR2A  
FCGR2C  
UBA7  
LPL  
IL22  
SYT11  
DOCK4  
P4HA3  
SDC2  
TNFRSF1B  
ACSL5  
TSHR  
HMGB1  
GJB2  
SCARF1  
EIF2AK1  
ZNF831  
LCOR  
BICC1  
KLRK1  
CTLA4

FCRL3  
DYSF  
ADGRF4  
STXBP6  
LINC00926  
SPAG4  
GIMAP5  
TIMD4  
RUFY4  
DPP8  
SDSL  
SCUBE3  
SAMHD1  
CEP128  
ARID5A  
ZNF80  
IL17RA  
NFKB2  
CARMIL2  
PSMD11  
RENBP  
INHBC  
SLC34A2  
TTBK2  
WIPF1  
LILRB2  
SLC25A45  
MED13L  
TNIK  
CD28  
SP100  
PSMD10  
PSMB10  
OTOA  
SDR9C7  
BMP2K  
NHSL2  
CD200R1  
GMPR  
SIRPG  
SOX5  
TGFBRAP1  
PSMD5  
ARHGAP18  
FAM171B  
ACSS3  
ADAMTS10  
CD300LF  
CCSER1  
C5orf56  
P2RX7  
PLEK  
FCGR1CP

MMP25  
GLRX  
HAVCR2  
TIFAB  
TNFSF8  
ETV7  
TRIR  
HLA-DQB1  
GPR18  
CCNT1  
LHFPL6  
UBE2L6  
PARP9  
PDE1A  
S1PR1  
XKR8  
GPC5  
SBSN  
P2RY11  
KCNH2  
GIPC3  
PRAM1  
RNASE7  
IFNGR2  
EDA2R  
SAMD9L  
CNR2  
NFATC2  
SLAMF1  
BFSP2  
FLT4  
CNTF  
PANX1  
MILR1  
IL4I1  
CEACAM4  
CD58  
SMIM1  
PSME2  
GRAP  
ADORA2A  
TMEM200A  
PVRIG  
IFIT2  
IFNGR1  
ACTN1  
KMO  
ZMYND15  
NCF4  
BATF  
MBNL3  
PRTG  
RTP5

NLRP12  
PABPC5  
FN1  
GBP4  
CRISPLD2  
CCDC170  
RHOJ  
SBNO1  
GBP1  
ARHGAP45  
BHLHA15  
HMSD  
ARHGAP25  
EGFR  
TXK  
APOC2  
ICK  
SPRR2D  
ITGBL1  
GPR25  
HIC1  
MNDA  
CD68  
NKG7  
HSPA6  
GPR84  
CCR4  
JMY  
UBR1  
ARHGEF15  
MSR1  
LAIR2  
DOK3  
FCGR1A  
ST3GAL5  
KLHL6  
CALR  
CLEC4M  
KLRC3  
ARL6IP5  
SCARF2  
ERN1  
AGAP2  
COL15A1  
RECK  
AVPR1A  
SFMBT2  
MYEF2  
CAMK1  
KIR3DL1  
GFI1  
PTGER2  
CD2

HECW2  
ST8SIA4  
FGR  
MYO7A  
VWF  
VSTM4  
NLRC4  
PSMD6  
LILRA1  
GHRL  
CD247  
ADAM28  
SYNDIG1  
CD80  
PKP3  
TUBB6  
IFNA21  
MEI1  
LTA  
LIMS1  
MEOX2  
FNIP2  
ETV3  
HMCN1  
TRAT1  
IFIT3  
PDCD1  
GPR132  
PSMD13  
CCL3L1  
IL18RAP  
VPS37D  
SERPINA1  
XBP1  
LGALS9  
VIM  
STAT5A  
CD93  
CDH20  
PPP1R9A  
PEAK1  
RIF1  
INMT  
LST1  
FCRL5  
IL3RA  
GNLY  
TGM2  
LCN10  
HLA-G  
IL18  
IL7  
PTPRJ

SIGLEC12  
TTC21B  
PNLIPRP3  
LAD1  
FMNL3  
TNFAIP6  
CXCR3  
CLEC9A  
TNFRSF10A  
ZFPM2  
PTPN6  
PTH1R  
RASSF5  
CSF3  
JCAD  
FKBP11  
TMEM106A  
CTSS  
ISG20  
PIK3CD-AS1  
LYN  
PLCB4  
GJD3  
GPR82  
NT5E  
TESPA1  
CELF2  
COL6A1  
CD160  
TGFB1  
CCR6  
TAOK1  
CREB3L1  
KLRG1  
FSTL1  
OSMR  
FAM168A  
ARRB1  
PPM1M  
CIITA  
EIF2AK3  
MITF  
NME8  
PSMC4  
TNFSF14  
TMC8  
ISG15  
THEMIS2  
FAM25A  
IL13RA1  
VAV1  
SAMD3  
VEGFB

TAP2  
QPRT  
ANO6  
CYBB  
KRT78  
TAPBPL  
CD1E  
CD34  
ACVR2A  
MAP3K2  
RAPGEF2  
LAT2  
EFTUD2  
CSF2RA  
MRPS21  
CD8A  
RAB33A  
CSGALNACT2  
TMEM79  
ACOXL  
ZNF185  
OAS3  
PIK3AP1  
STAT4  
IFNL2  
OAS2  
SIGLEC9  
JSRP1  
CAVIN1  
IDO2  
ZKSCAN1  
FGF7  
F5  
OSCAR  
CREB1  
IL36G  
ABCA6  
GCSAM  
ST6GAL1  
TUBA4A  
SCIMP  
ANKRD36BP1  
IFI27  
CALHM5  
ANXA6  
MYO9A  
EMILIN1  
SELPLG  
MCEMP1  
NCCRP1  
CACNA2D2  
ICOSLG  
LILRA4

PRG2  
TMIGD2  
KDR  
SRGN  
CXCR6  
CCL16  
VTCN1  
PPFIA2  
IL22RA1  
THSD7A  
LPAR4  
PDGFRB  
PNMA2  
IDO1  
COL6A6  
PSMD2  
ITGAX  
APOBEC3D  
RAET1G  
PDCD1LG2  
LAX1  
CTTNBP2  
ZBP1  
KLHL23  
C1orf162  
IL10  
RAB8B  
SYNE1  
KLK9  
TRIM21  
GMFG  
MIR155HG  
LUM  
CHRD  
C1orf127  
POMK  
LATS1  
F2R  
HSD11B1  
SLC29A3  
SERINC5  
BCL2L14  
CYSLTR1  
CXorf65  
ADAMTS14  
ADGRA2  
LIG3  
UCP2  
EMCN  
CMPK2  
ADAMTS16  
MYO1F  
KRT6C



IGDCC4  
GMIP  
EPCAM  
CACNA2D4  
HDC  
CD72  
NCR3  
CEACAM21  
PECAM1  
ISLR  
CRLF2  
CCDC141  
TRAF1  
CCL1  
PLCL1  
IL2RB  
MED13  
ZNF671  
C4A  
MS4A14  
HSPA1B  
GUCY1A2  
HCK  
CTSL  
PLVAP  
C3AR1  
HGF  
ATP8B4  
ROBO4  
HFE  
SH2D5  
SMPDL3B  
SLC24A4  
ARSB  
COLGALT2  
PSMC6  
PDE1B  
DSG1  
PRSS27  
LEP  
NECTIN2  
OVOL1  
CCRL2  
KIR2DL3  
IFI35  
TMEM119  
PREX2  
HLA-DQB2  
PCDH17  
DLC1  
DOK1  
SLC10A2  
SPN

BTN2A2  
LPXN  
VGLL3  
PSMC5  
ZNF215  
GIT2  
NLRP3  
PTPN7  
EPS8L1  
CR1L  
DHRS1  
EBF1  
ADAMTSL2  
DAB2  
PRRX1  
PDGFB  
C9orf139  
ENPP4  
GPR174  
DENND6B  
PAK5  
FAT4  
THEMIS  
IGFLR1  
KLRD1  
NCF1C  
KCND2  
ECM2  
FGF14  
PDE6G  
IL13  
PAFAH1B2  
TNFRSF6B  
RBP5  
RNF180  
DOK6  
MFAP3  
TNFSF18  
TVP23A  
MRPL27  
TBC1D10C  
RFXAP  
SPOCK2  
FCAR  
HSPA4  
TCIRG1  
LEPR  
SH2D1A  
THBS1  
GPIHBP1  
TLR5  
IL5  
GPSM3

RFXANK  
FMNL1  
ARHGAP9  
DENND1C  
OAS1  
GPR55  
EBF2  
RNF222  
NFYC  
IL10RB  
TMEM233  
LHFPL2  
RASGRP3  
TIMP3  
DPEP2  
AMPH  
IGSF6  
SLIRP  
ITGB2  
LAMA2  
SNAI3  
CRTAM  
LTC4S  
PTGFR  
FAM13C  
CYP1B1  
SLC8A1  
PLIN3  
FGD3  
PARVG  
CCR1  
DSC1  
PROM1  
IL2  
C1orf54  
BATF2  
CRCT1  
CTSZ  
GNS  
SVOPL  
ZCCHC24  
ENPEP  
BEX5  
PRF1  
PIK3R6  
RUNX1T1  
VENTX  
IL1R1  
FCRL4  
FAM155A  
RAET1E  
NTRK1  
ESAM

IL27  
UBXN1  
FHL5  
LDB2  
SIRPB1  
CLEC4E  
CHRNA6  
GREM1  
GZMK  
SEC24D  
NLRC5  
ALOXE3  
ANKRD36BP2  
STARD13  
TLR1  
BANK1  
PSMB8  
IFNE  
CLEC4A  
PTPRO  
ALOX5AP  
CSF1  
FLT1  
CDC42SE2  
HLA-A  
PTAFR  
GJA5  
HEYL  
KLRC2  
SGCD  
RGS13  
S100A8  
GPC6  
TBCEL  
HSPA12B  
EPS8  
CD207  
HLA-DRA  
TNFRSF13C  
CCL25  
LIPA  
CHIT1  
CD70  
BTN3A1  
C11orf21  
ZNF835  
RNASE6  
BST2  
STRN  
EIF2AK4  
IL21  
INHBE  
SLC39A2

ACKR3  
CYFIP2  
IL18R1  
CYSLTR2  
GIMAP2  
FCGR3B  
TGFB2  
PAM16  
RAD23B  
ANKRD55  
HLA-E  
IL23R  
RIN3  
PDIA2  
VASH1  
AP3B1  
KIR2DS4  
ACE  
TSLP  
ARRB2  
CHN1  
ANGPTL2  
RFX5  
TNF  
SLC7A7  
CLEC6A  
IL5RA  
RAB39A  
ASXL2  
ARHGDIB  
FNDC1  
C6orf132  
TNFRSF8  
HLA-DQA1  
CD300C  
CLTB  
SARDH  
CD3G  
CCL2  
ABI3  
IRF7  
ITGA2B  
ALDH3B1  
CORIN  
PDGFC  
ROR1  
MYO1G  
RC3H2  
GJA4  
TLR10  
SPRY1  
CTSO  
ALPK2

PLXDC1  
LTBP2  
GPR141  
MAP7D1  
PARP15  
CHST13  
SAMSN1  
RASAL3  
ADPRH  
ITGB1  
IFNAR2  
CD300A  
TNFAIP8L2  
IFI44L  
TYROBP  
SEC24A  
TGFB2  
CYTIP  
FBXL7  
ZNF620  
IL1RL1  
NCF1  
LAPTM5  
SCEL  
OGFRL1  
GPR137B  
FLI1  
PCDH18  
HTR2A  
KIR3DL3  
CYP27A1  
SLC12A3  
KCNT2  
IL19  
NOTCH4  
KLRC1  
PCDHGA12  
AQP10  
MAN1C1  
APOBEC3G  
VAMP5  
IL7R  
LCK  
BST1  
SLURP1  
GDF5  
MVP  
AMHR2  
RIPOR2  
FAM30A  
LRRC25  
DIXDC1  
TLR4

SFN  
PKHD1L1  
S100A7A  
MFRP  
CCR7  
SECISBP2L  
PRKG1  
PLA2G4E  
SOX17  
PMP22  
TMEM176B  
HIST1H3H  
BTN3A3  
FPR1  
RPS6KA4  
TNFRSF25  
TENM3  
CCL3  
KCNK13  
KL  
ITGA9  
LY9  
RASSF4  
GBGT1  
LTBR  
PDE3B  
RAMP3  
AKNA  
HVCN1  
ZBTB32  
HLX  
XAF1  
SIGLEC10  
HSP90AA1  
RGS5  
XCR1  
TRPV2  
GLIS3  
SLCO2B1  
KIR2DL1  
ENOX1  
GGTA1P  
DOK5  
APOE  
ENG  
RAPGEF6  
WARS  
PIK3R5  
ZNF423  
CLNK  
SLAMF6  
IL12B  
ITGA5

UQCC2  
FASLG  
FCER1G  
UHMK1  
APLNR  
ZNF660  
TNFRSF4  
ETS1  
JAK3  
CD40  
CCR10  
PODN  
HLA-DOB  
CORO1A  
NCOA2  
DKK2  
PSMD8  
CREBL2  
ALOX5  
MPP1  
FZD4  
MAP1LC3C  
ERCC6L2  
B2M  
KCNK6  
SGIP1  
SON  
ACVR1  
LILRB3  
PLEKHO1  
IL12RB1  
RTKN2  
APOBEC3H  
ZNF366  
CTF1  
TPSD1  
IFNLR1  
SNED1  
CCDC102B  
TGFB3  
ICAM1  
MYCT1  
HERC6  
BHLHE22  
SPRR2G  
GPR4  
UNC93B1  
MAGEL2  
HS3ST1  
IGSF21  
SLAMF8  
APOL6  
LYL1



ASGR2  
TSPAN4  
AIM2  
HSD17B14  
PSMC1  
ST3GAL2  
PLA2G7  
BCL2A1  
PYHIN1  
STK33  
PATZ1  
ANKRD17  
CLCF1  
FGD5  
TMEM204  
SIGLEC6  
NID2  
HLA-DPB1  
CD53  
SH2B3  
HLA-C  
IL17RB  
ASXL3  
MFNG  
IFNA13  
CD84  
HNMT  
RTP4  
MX1  
DDI2  
ATE1  
EPOR  
DNAJC5B  
GAPT  
TNFRSF18  
GRIN3A  
DLL4  
ADGRE5  
SLC6A12  
STK17B  
ABCC9  
MICAL2  
MRPS12  
FKBP7  
BMPR1A  
CLEC11A  
CX3CR1  
EPSTI1  
MEDAG  
BMPR2  
CCR5  
ARHGAP4  
SOWAHD

FCRL6  
EGF  
ADGRE2  
CCR3  
NCR1  
MXRA8  
RASGRP4  
PIM2  
REL  
NCF2  
EHD2  
SEM1  
PTPRCAP  
ITGA4  
PLCB2  
FCN1  
SIGLEC14  
AP1S2  
NR1H3  
PKD2L1  
CSMD2  
CACNA1C  
BMPR1B  
GNAI2  
TMEM156  
LILRB4  
S1PR4  
CNFN  
TIGIT  
PDGFA  
TM4SF18  
UNC13D  
ADGRF5  
CD274  
SIGLEC5  
CCR8  
SLC25A53  
MARCO  
PHACTR1  
ITGA1  
ADAM6  
TAP1  
ARHGAP30  
PRKAR2A  
CLEC4D  
LGMN  
SULT1C4  
HLA-DRB5  
DOCK11  
LILRP2  
CR1  
HIST1H2AM  
ZNF683

ANKRD44  
IL2RA  
APOL3  
IPCEF1  
CMAHP  
VEGFC  
BNC2  
SIRPB2  
SP140  
GATA3  
NFKBID  
CTSK  
LILRA2  
IKZF3  
TLR8  
SELL  
MRO  
LATS2  
CPZ  
RTRAF  
USP51  
CARD9  
IL1RAP  
TNFRSF10D  
TTC16  
GVINP1  
MAN1A2  
CD8B  
NRXN3  
IL17A  
IL15  
EPO  
CCL4  
EDA  
LCE3D  
CD5  
SH2D3C  
GRAP2  
GPRIN3  
GATA2  
ADGRD1  
CXCR5  
SLC2A5  
PARP12  
PIP4K2A  
TNFSF13B  
PTGIR  
IRF9  
IL2RG  
GNG11  
TNS3  
TMEM176A  
EIF2A

PPL  
KIRREL1  
S100A16  
COL4A2  
NFYA  
PSME3  
C19orf38  
LY96  
DUSP16  
RAB42  
CD86  
C5AR1  
ADAMTS5  
ANTXR1  
ART4  
P2RY2  
GNA15  
CDSN  
P2RX5  
PDGFRL  
FILIP1L  
CCL17  
TNIP3  
SLA2  
ADGRE4P  
DOK2  
ULBP1  
CXCR4  
PSMD7  
TBXA2R  
ST6GALNAC3  
AEBP1  
CTSE  
ASPN  
PCED1B  
IFNL1  
HAVCR1  
EFEMP2  
HLA-DMB  
ZC3H12D  
C1orf116  
COL6A5  
CCL18  
HRH2  
HSPA8  
RNF166  
ASAH1  
PEAK3  
PSMB9  
HLA-DOA  
PSME1  
LRRC17  
ZNF469

CTSB  
RASSF6  
ZNF521  
TLR9  
ZNF827  
DMXL2  
GTF2A1  
KLHL11  
MMP16  
ADCYAP1  
RAB39B  
APBB2  
ENTPD1  
ADGRG5  
RGPD1  
TTC24  
POSTN  
HSH2D  
ZBTB10  
ARHGAP15  
NIPAL4  
RUNX3  
PIEZO2  
KCNJ10  
GPBAR1  
ARRDC5  
IFNAR1  
MICB  
IFI30  
FAM83A-AS1  
CCL22  
CARD11  
DCANP1  
CDKL5  
AOAH  
JAKMIP1  
SUCNR1  
MRPL55  
HLA-DQA2  
KLRC4  
CANX  
TRAF3IP3  
IL6  
CETP  
IRF1  
NAIP  
CD6  
ACP5  
TNFRSF1A  
GPR78  
GATA1  
CAMK4  
IFNB1

ZNF804A  
SFTPB  
SNX20  
ROCK2  
HK3  
SAMMD14  
MR1  
ITGB3  
HIPK3  
B3GAT1  
PUS10  
KIR3DL2  
TIE1  
TREM2  
FPR2  
SOD3  
CLEC1A  
TBX21  
STARD8  
IFFO1  
CST7  
CERKL  
TAPBP  
RRN3P2  
LMTK2  
CD226  
LGI2  
PSMD4  
TNFRSF9  
SELP  
NOX4  
DUOXA1  
ITK  
RGS18  
TNFRSF11A  
CYTH4  
TNN  
SLC45A3  
FICD  
IL15RA  
SDS  
BATF3  
CALB2  
ADTRP  
EVPL  
CD1C  
CD79B  
MCOLN2  
CLEC5A  
IL10RA  
NR5A2  
CDH11  
ATP2A3

CTHRC1  
LY86  
BMP7  
P2RY12  
DDR2  
KLK7  
CLMP  
TREM1  
IFITM1  
RNF125  
KIF21B  
TNFRSF17  
PROCR  
GYPC  
CNTFR  
P2RX4  
CCL28  
CXCL9  
LGALS2  
RGL1  
IGSF10  
FBLN5  
CCL11  
XPNPEP2  
IL20RA  
TNFRSF13B  
PVR  
EBI3  
ANKRD22  
CCL8  
MRGPRF  
DACT3  
MZB1  
KLRB1  
FNBP1  
ABI3BP  
IL1RN  
RUBCNL  
CLIC5  
LAMC2  
ATP8A1  
CD163L1  
CXCL2  
MGAT4A  
SPARCL1  
ALDH1A1  
UBD  
PBX4  
SULT2B1  
JAM2  
GIMAP7  
EDAR  
SALL2

STAB1  
HSP90AB1  
LYPD3  
MS4A7  
P2RY13  
PRKAR2B  
LILRB5  
GIMAP8  
VEGFA  
P2RY8  
SFRP2  
PPM1H  
PFDN2  
C1QTNF7  
AKAP5  
OASL  
KCNMB1  
KCTD12  
VPREB3  
CD180  
FRZB  
TESC  
HSPA2  
PDE3A  
MGAT5  
COL14A1  
SULT1C2  
ADA2  
MRVI1  
CTSG  
RELN  
ACTA2  
CCL19  
AQP1  
FCER2  
MMP14  
CCL21  
TMEM140  
EVI2B  
GSDMA  
ADAM12  
KIR2DL4  
AQP9  
CD163  
RASSF2  
FCMR  
NXPE4  
CD48  
GZMA  
FUCA1  
CXCL8  
ZEB2  
STAP1



DMKN  
PLPP3  
FBLN2  
MAN1A1  
TNFRSF12A  
CLIP3  
PTPRC  
PTGIS  
CD7  
RCAN2  
P2RY10  
CPVL  
EDNRB  
SSC5D  
AZGP1  
SELENBP1  
HSPA1A  
GLIPR2  
TLR3  
PLEK2  
RAB37  
MS4A2  
CTSW  
WNT2  
CHAC1  
IL23A  
C15orf48  
PPP1R16B  
PIK3CG  
CLIC2  
FCRLA  
STRIP2  
HLA-DPA1  
PADI2  
NAALADL1  
F13A1  
FCGBP  
KIT  
TNFRSF11B  
SHE  
TPSG1  
MAP4K1  
KRT16  
LRRC15  
ARHGEF6  
TRPV3  
CPNE5  
MS4A4A  
LOXL2  
TAGAP  
CPXM1  
TLR7  
P2RX1

TSPAN11  
IL1B  
DPEP1  
GZMM  
OLFML1  
FAM49A  
FAS  
CDH3  
RHOD  
C16orf54  
COL11A1  
SPRR1B  
COL5A2  
ADRM1  
COL3A1  
BDKRB2  
PSMD14  
ADAMTS12  
KCNA3  
ADRA2A  
PRELP  
KCNN4  
HAPLN3  
KRT6A  
CD209  
SPRR1A  
SPARC  
ENPP2  
DENND2A  
PLA2G2D  
PARM1  
PDGFRA  
COL4A1  
ACVRL1  
SIGLEC1  
ABCB1  
CD36  
MSRB3  
CSF1R  
FGL2  
PLPP4  
INHBB  
RARRES2  
APOBR  
PLAC9  
ICAM3  
IL11  
CCL20  
ZEB1  
SPIB  
CFP  
INPP5D  
KIAA1549

SNTB1  
CCL23  
COL5A3  
BGN  
FOXP3  
ABCA9  
SLC17A9  
MMP3  
LRMP  
FAP  
PAG1  
ABCA8  
PGM5  
ITGB7  
TMEM47  
BHLHE41  
HPGDS  
FSTL3  
SIGLEC8  
RSAD2  
CMA1  
COL12A1  
TNFRSF10B  
CILP  
OLFML3  
CD14  
BLK  
SERPINE1  
AKAP12  
FCER1A  
CD79A  
CLIC3  
CD3E  
AIF1  
SPNS3  
CHRDL1  
AMH  
HLA2  
ENPP3  
C7  
KITLG  
CASP5  
UBXN11  
THY1  
LCP1  
MET  
COLEC12  
CD22  
BTK  
FAM107A  
MAOB  
DERL3  
GNG2

C1QA  
PLCL2  
ERP27  
CXCL11  
RIMKLA  
RTN1  
SLIT2  
DUSP4  
S100B  
IRF4  
SLAMF7  
RAI2  
HTRA3  
SECTM1  
BMP2  
CCR2  
CXCL1  
JCHAIN  
BEND5  
SKAP1  
CXCL16  
CCDC69  
MRC1  
CCDC80  
RIN1  
SPON1  
ULBP2  
UNC5C  
TNFSF9  
CLEC3B  
SULF1  
GPR183  
TCEAL7  
ADAMTS4  
COL1A2  
COL5A1  
RNASE1  
APOBEC3A  
ITM2A  
LYVE1  
LIME1  
DPT  
GNG7  
CXCL3  
CD27  
CXCL10  
CCL13  
TRANK1  
ANK2  
VSIG4  
INHBA  
CLEC4G  
PDZRN3

IL1A  
JAML  
PRKCB  
PKIB  
NEGR1  
VEGFD  
TNFSF11  
ITGAL  
CD4  
VCAN  
IL16  
CXCL6  
A2M  
OLFML2B  
FSCN1  
NCKAP1L  
SHISAL1  
HCLS1  
AMPD1  
DHRS9  
COL10A1  
KCNN3  
TCL1A  
AGTR1  
VSIR  
AFF3  
ANGPTL1  
PEG3  
CXCL5  
E2F5  
DCN  
PTGDS  
LIFR  
S100A9  
MGP  
CAV1  
PPP1R13L  
SCN7A  
GIMAP6  
RASGRP2  
RAET1L  
DDX60  
ACKR1  
MFAP4  
LSP1  
SDCBP2  
PDZK1IP1  
GAS7  
EDNRA  
EVI2A  
GJB3  
XCL2  
MEF2C

IQGAP2  
PNOC  
ITGA8  
AHCYL2  
TIMM50  
TGFBI  
CALD1  
CCL5  
PPBP  
ADAMTS2  
APBB1IP  
NAP1L3  
DAAM2  
RASL12  
TNFSF15  
MPEG1  
C1QC  
CR2  
CMKLR1  
CSF2  
FOLR2  
FERMT2  
JAM3  
COL1A1  
SNRPF  
OMD  
IL1R2  
TPSB2  
ADAMDEC1  
TOX  
NUGGC  
CPA3  
RCSD1  
CCL26  
IKZF1  
ARHGEF37  
TEK  
CD37  
GIMAP1  
CCL14  
KRT6B  
CLEC10A  
COL8A1  
GPR157  
IL6R  
CXCL12  
C10orf99  
GFRA3  
IL6ST  
NDNF  
GZMB  
SH2D2A  
GHR

C2  
IFI6  
S100A2  
ULBP3  
GJB5  
LIF  
CNRIP1  
IFITM3  
FLVCR2  
GALNT15  
FAM177B  
ITGA11  
GPR15  
OSM  
SLIT3  
MS4A6A  
SLC11A1  
PTGDR  
MS4A1  
CD1D  
OGN  
MMP12  
ACHE  
OLR1  
MMP9  
HPGD  
TCN2  
SASH3  
CD19  
GPR34  
MMP1  
GIMAP4  
TNFSF10  
C1QB  
P2RY14  
MMRN1  
SAMD9  
CCL24  
AREG  
CD52  
LMOD1  
POU2AF1  
AOC3  
PLEKHN1  
THBS2  
CXCL13  
CYSRT1  
CSF2RB  
CPED1  
TPSAB1  
CCL15  
MXD1

**Supplementary Table 4 The list of autophagy-related genes AMBRA1**

APOL1

ARNT

ARSA

ARSB

ATF4

ATF6

ATG10

ATG12

ATG16L1

ATG16L2

ATG2A

ATG2B

ATG3

ATG4A

ATG4B

ATG4C

ATG4D

ATG5

ATG7

ATG9A

ATG9B

ATIC

BAG1

BAG3

BAK1

BAX

BCL2

BCL2L1

BECN1

BID

BIRC5

BIRC6

BNIP1

BNIP3

BNIP3L

C12orf44

C17orf88

CALCOCO2

CAMKK2

CANX

CAPN1

CAPN10

CAPN2

CAPNS1

CASP1

CASP3

CASP4

CASP8

CCL2

CCR2

CD46



CDKN1A  
CDKN1B  
CDKN2A  
CFLAR  
CHMP2B  
CHMP4B  
CLN3  
CTSB  
CTSD  
CTSL1  
CX3CL1  
CXCR4  
DAPK1  
DAPK2  
DDIT3  
DIRAS3  
DLC1  
DNAJB1  
DNAJB9  
DRAM1  
EDEM1  
EEF2  
EEF2K  
EGFR  
EIF2AK2  
EIF2AK3  
EIF2S1  
EIF4EBP1  
EIF4G1  
ERBB2  
ERN1  
ERO1L  
FADD  
FAM48A  
FAS  
FKBP1A  
FKBP1B  
FOS  
FOXO1  
FOXO3  
GAA  
GAA  
GABARAP  
GABARAP  
GABARAPL1  
GABARAPL1  
GABARAPL2  
GABARAPL2  
GAPDH  
GAPDH  
GNAI3  
GNAI3  
GNB2L1

GNB2L1  
GOPC  
GOPC  
GRID1  
GRID1  
GRID2  
GRID2  
HDAC1  
HDAC6  
HGS  
HIF1A  
HSP90AB1  
HSPA5  
HSPA8  
HSPB8  
IFNG  
IKBKB  
IKBKE  
IL24  
IRGM  
ITGA3  
ITGA6  
ITGB1  
ITGB4  
ITPR1  
KIAA0226  
KIAA0652  
KIAA0831  
KIF5B  
KLHL24  
LAMP1  
LAMP2  
MAP1LC3A  
MAP1LC3B  
MAP1LC3C  
MAP2K7  
MAPK1  
MAPK3  
MAPK8  
MAPK8IP1  
MAPK9  
MBTPS2  
MLST8  
MTMR14  
MTOR  
MYC  
NAF1  
NAMPT  
NBR1  
NCKAP1  
NFE2L2  
NFKB1  
NKX2-3

NLRC4  
NPC1  
NRG1  
NRG2  
NRG3  
P4HB  
PARK2  
PARP1  
PEA15  
PELP1  
PEX14  
PEX3  
PIK3C3  
PIK3R4  
PINK1  
PPP1R15A  
PRKAB1  
PRKAR1A  
PRKCD  
PRKCQ  
PTEN  
PTK6  
RAB11A  
RAB1A  
RAB24  
RAB33B  
RAB5A  
RAB7A  
RAC1  
RAF1  
RB1  
RB1CC1  
RELA  
RGS19  
RHEB  
RPS6KB1  
RPTOR  
SAR1A  
SERPINA1  
SESN2  
SH3GLB1  
SIRT1  
SIRT2  
SPHK1  
SPNS1  
SQSTM1  
ST13  
STK11  
TBK1  
TM9SF1  
TMEM49  
TMEM74  
TNFSF10

TP53  
TP53INP2  
TP63  
TP73  
TSC1  
TSC2  
TUSC1  
ULK1  
ULK2  
ULK3  
USP10  
UVRAG  
VAMP3  
VAMP7  
VEGFA  
WDFY3  
WDR45  
WDR45L  
WIP1  
WIP2  
ZFYVE1

**Supplementary Table 5 The details of 72 OSIDDRGs**

| <b>Gene symbol</b> | <b>Log(fold change)</b> | <b>Adjusted p-value</b> |
|--------------------|-------------------------|-------------------------|
| APOD               | -6.43                   | 1.74E-07                |
| MMP2               | -2.88                   | 1.37E-03                |
| PRR5L              | -2.15                   | 2.72E-04                |
| GLRX2              | -1.95                   | 1.06E-04                |
| CAMKK2             | -1.90                   | 3.18E-06                |
| MAPT               | -1.83                   | 5.97E-05                |
| ADAM9              | -1.83                   | 5.51E-03                |
| TRPM2              | -1.75                   | 2.68E-04                |
| IL6                | -1.64                   | 2.54E-02                |
| KEAP1              | -1.60                   | 2.49E-02                |
| PSMB5              | -1.51                   | 4.14E-03                |
| AQP1               | -1.47                   | 5.81E-05                |
| GNAO1              | -1.27                   | 2.33E-03                |
| SLC23A2            | -1.27                   | 2.42E-02                |
| FXN                | -1.23                   | 2.74E-02                |
| EDN1               | -1.23                   | 4.40E-02                |
| STOX1              | -1.21                   | 5.37E-04                |
| PRNP               | -1.15                   | 1.10E-02                |
| MAPK13             | -1.15                   | 1.81E-02                |
| PLEKHA1            | -1.13                   | 2.68E-02                |
| ATP13A2            | -1.11                   | 1.46E-03                |
| MGST1              | -1.08                   | 4.13E-04                |
| SIRPA              | -1.07                   | 1.65E-02                |
| VRK2               | -1.03                   | 2.40E-02                |
| MT-CO1             | -1.01                   | 1.11E-03                |
| PRDX1              | 1.00                    | 3.25E-02                |
| DUSP1              | 1.04                    | 4.61E-05                |
| ALAD               | 1.13                    | 2.37E-02                |
| NDUFB4             | 1.14                    | 1.36E-04                |
| DUOX1              | 1.15                    | 1.17E-02                |
| MCL1               | 1.20                    | 3.02E-04                |
| GPX7               | 1.21                    | 1.44E-02                |
| ERCC3              | 1.21                    | 1.23E-03                |
| HIF1A              | 1.22                    | 2.18E-02                |
| NDUFA6             | 1.23                    | 6.24E-03                |
| KDM6B              | 1.23                    | 1.35E-03                |
| GCLM               | 1.23                    | 2.33E-03                |
| ERN1               | 1.26                    | 3.92E-03                |
| GPX3               | 1.27                    | 6.01E-05                |
| HSPA1A             | 1.28                    | 5.48E-05                |
| SELENOK            | 1.30                    | 2.31E-04                |
| TNFAIP3            | 1.30                    | 1.67E-02                |
| MMP3               | 1.33                    | 2.48E-04                |
| PML                | 1.37                    | 3.76E-05                |
| JAK2               | 1.38                    | 6.99E-03                |
| SIGMAR1            | 1.39                    | 7.67E-06                |
| HSPA1B             | 1.41                    | 1.27E-04                |
| TXN2               | 1.50                    | 4.91E-04                |
| SESN3              | 1.58                    | 4.50E-03                |
| HMOX1              | 1.60                    | 6.15E-04                |
| SFPQ               | 1.63                    | 3.76E-05                |

|        |      |          |
|--------|------|----------|
| FBXO7  | 1.65 | 2.15E-05 |
| MAPK1  | 1.69 | 6.99E-03 |
| MSRB2  | 1.71 | 2.68E-04 |
| ATRNL  | 1.71 | 1.14E-05 |
| CCR7   | 1.77 | 3.86E-03 |
| SNCA   | 1.83 | 1.69E-06 |
| PRDX4  | 1.87 | 5.23E-06 |
| LANCL1 | 2.11 | 9.86E-06 |
| PRDX6  | 2.14 | 2.42E-06 |
| JUN    | 2.16 | 8.92E-07 |
| ATF4   | 2.45 | 1.05E-05 |
| FOXO1  | 2.66 | 2.27E-05 |
| KLF2   | 2.68 | 1.34E-06 |
| PYCR2  | 2.82 | 4.33E-06 |
| MT-ND1 | 3.18 | 2.91E-07 |
| KLF4   | 3.46 | 1.83E-07 |
| CYP1B1 | 3.48 | 1.96E-05 |
| SCARA3 | 3.52 | 1.90E-07 |
| TXNRD1 | 3.56 | 6.01E-08 |
| HBA1   | 6.39 | 3.36E-10 |
| HBB    | 8.19 | 1.39E-09 |

**Supplementary Table 6 The predicted lncRNAs for miRNAs using LncBase database**

| <b>hsa-miR-1184</b>          | <b>hsa-miR-1273g-3p</b>      | <b>hsa-miR-1827</b>          |
|------------------------------|------------------------------|------------------------------|
| chr22-38_28785274-29006793.1 | chr22-38_28785274-29006793.1 | chr22-38_28785274-29006793.1 |
| KCNQ1OT1                     | XLOC_007321                  | LOC100190986                 |
| XLOC_003397                  | RP11-1094M14.14              | RP13-580B18.4                |
| XLOC_010295                  | ZNF561-AS1                   | RP11-92B11.3                 |
| AC006548.28                  | RP4-734G22.3                 | LINC00960                    |
| TMEM191C                     | MIR4534                      | RP11-80F22.15                |
| LINC00475                    | AC006548.28                  | RP11-458F8.4                 |
| TMEM191C                     | RP11-2E17.2                  | XLOC_006242                  |
| XLOC_001668                  | RP11-509A17.3                | MIR4534                      |
| XLOC_003405                  | XLOC_006684                  | RP11-80F22.15                |
| <b>hsa-miR-3173-3p</b>       | <b>hsa-miR-4434</b>          | <b>hsa-miR-4533</b>          |
| chr22-38_28785274-29006793.1 | chr22-38_28785274-29006793.1 | chr22-38_28785274-29006793.1 |
| CTB-176F20.3                 | KCNQ1OT1                     | MIR4313                      |
| LINC00665                    | CTB-176F20.3                 | KCNQ1OT1                     |
| MIR6818                      | CTA-125H2.2                  | RP11-526P6.1                 |
| LINC00665                    | AC006548.28                  | RP11-631M21.1                |
| RP11-96K19.4                 | RP11-244B22.6                | AP005530.2                   |
| AC006548.28                  | XLOC_012981                  | XLOC_002903                  |
| AC010226.4                   | CTD-2314B22.1                | AC093627.7                   |
| FAM201A                      | MIR4534                      | CTA-992D9.11                 |
| XLOC_011696                  | KCNQ1OT1                     | XLOC_008878                  |
| <b>hsa-miR-4726-5p</b>       | <b>hsa-miR-4747-5p</b>       | <b>hsa-miR-4769-5p</b>       |
| RP11-989E6.10                | chr22-38_28785274-29006793.1 | chr22-38_28785274-29006793.1 |
| chr22-38_28785274-29006793.1 | XLOC_013784                  | XLOC_013010                  |
| XLOC_011157                  | KCNQ1OT1                     | KCNQ1OT1                     |
| RP11-1437A8.4                | AC006548.28                  | XLOC_010191                  |
| RP11-85I21.1                 | XLOC_007248                  | AC006548.28                  |
| XLOC_001644                  | XLOC_000017                  | RP11-46H11.3                 |
| AC006548.28                  | C1orf143                     | LL22NC03-86G7.1              |
| RP11-85I21.1                 | RP11-162A12.4                | MIR4534                      |
| C16orf47                     | XLOC_005623                  | RP11-554D14.6                |
| LINC00662                    | XLOC_009990                  | RP3-323A16.1                 |

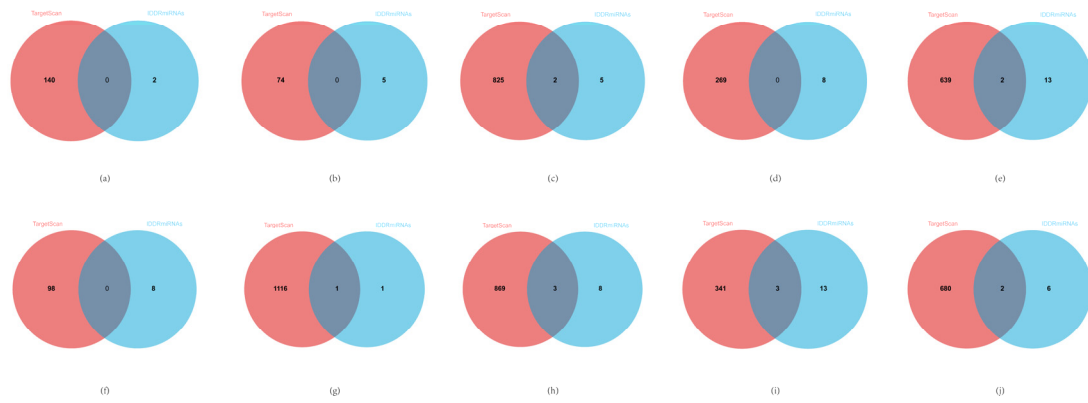

Supplementary Figure 1 The intersection between iDDRmiRNAs and predicted miRNAs using the TargetScanHuman. (a) IL6; (b) PRDX1; (c) MCL1; (d) HMOX1; (e) TXNRD1; (f) MAPK1; (g) HIF1A; (h) FOXO1; (i) JUN; (j) JAK2.
